# Supplementary material
Source: PubMed Central journal article supplement (PMC6748818)
Supplement: djy224_supplementary_data.pdf [file djy224_supplementary_data.pdf]

## Supplementary Material

“Association of estrogen receptor alpha expression with survival in oropharyngeal cancer following chemoradiation therapy”

### Supplementary Tables

**Supplementary Table 1. Genes with mRNA expression evaluated for activation of nuclear ER $\alpha$  signaling\***

| <b>Entrez Gene ID</b> | <b>Gene Symbol</b> | <b>Gene Description</b>                                                                     |
|-----------------------|--------------------|---------------------------------------------------------------------------------------------|
| 21                    | <i>ABCA3</i>       | ATP-binding cassette, subfamily A member 3                                                  |
| 8125                  | <i>ANP32A</i>      | acidic nuclear phosphoprotein 32 family member A                                            |
| 162                   | <i>AP1B1</i>       | adaptor-related protein complex 1, beta 1 subunit                                           |
| 322                   | <i>APBB1</i>       | amyloid beta precursor protein-binding family B member 1                                    |
| 522                   | <i>ATP5J</i>       | ATP synthase, H <sup>+</sup> transporting, mitochondrial, F <sub>0</sub> complex, subunit F |
| 8313                  | <i>AXIN2</i>       | axin 2                                                                                      |
| 672                   | <i>BRCA1</i>       | breast cancer 1, early onset                                                                |
| 718                   | <i>C3</i>          | complement component 3                                                                      |
| 57658                 | <i>CALCOCO1</i>    | calcium binding and coiled-coil domain 1                                                    |
| 595                   | <i>CCND1</i>       | cyclin D1                                                                                   |
| 3732                  | <i>CD82</i>        | CD82 molecule                                                                               |
| 1051                  | <i>CEBPB</i>       | CCAAT/enhancer binding protein (C/EBP), beta                                                |
| 1147                  | <i>CHUK</i>        | conserved helix-loop-helix ubiquitous kinase                                                |
| 80781                 | <i>COL18A1</i>     | collagen, type XVIII, alpha 1                                                               |
| 1509                  | <i>CTSD</i>        | cathepsin D                                                                                 |
| 10521                 | <i>DDX17</i>       | DEAD (Asp-Glu-Ala-Asp) box polypeptide 17                                                   |
| 79039                 | <i>DDX54</i>       | DEAD (Asp-Glu-Ala-Asp) box polypeptide 54                                                   |
| 1826                  | <i>DSCAM</i>       | Down syndrome cell adhesion molecule                                                        |
| 9166                  | <i>EBAG9</i>       | estrogen receptor binding site associated, antigen, 9                                       |
| 2033                  | <i>EP300</i>       | E1A binding protein p300                                                                    |
| 2100                  | <i>ESR2</i>        | estrogen receptor 2 (ER beta)                                                               |
| 9687                  | <i>GREB1</i>       | growth regulating estrogen receptor binding 1                                               |
| 3065                  | <i>HDAC1</i>       | histone deacetylase 1                                                                       |
| 9759                  | <i>HDAC4</i>       | histone deacetylase 4                                                                       |
| 3298                  | <i>HSF2</i>        | heat shock transcription factor 2                                                           |
| 3725                  | <i>JUN</i>         | jun proto-oncogene                                                                          |
| 3823                  | <i>KLRC3</i>       | killer cell lectin like receptor C3                                                         |
| 84458                 | <i>LCOR</i>        | ligand dependent nuclear receptor corepressor                                               |
| 8543                  | <i>LMO4</i>        | LIM domain only 4                                                                           |
| 5469                  | <i>MED1</i>        | mediator complex subunit 1                                                                  |
| 4350                  | <i>MPG</i>         | N-methylpurine-DNA glycosylase                                                              |
| 9112                  | <i>MTA1</i>        | metastasis associated 1                                                                     |

|        |               |                                                                   |
|--------|---------------|-------------------------------------------------------------------|
| 4609   | <i>MYC</i>    | MYC proto-oncogene, bHLH transcription factor                     |
| 8648   | <i>NCOA1</i>  | nuclear receptor coactivator 1                                    |
| 10499  | <i>NCOA2</i>  | nuclear receptor coactivator 2                                    |
| 8202   | <i>NCOA3</i>  | nuclear receptor coactivator 3                                    |
| 135112 | <i>NCOA7</i>  | nuclear receptor coactivator 7                                    |
| 9611   | <i>NCOR1</i>  | nuclear receptor corepressor 1                                    |
| 9612   | <i>NCOR2</i>  | nuclear receptor corepressor 2                                    |
| 4731   | <i>NDUFV3</i> | NADH:ubiquinone oxidoreductase subunit V3                         |
| 4738   | <i>NEDD8</i>  | neural precursor cell expressed, developmentally down-regulated 8 |
| 190    | <i>NR0B1</i>  | nuclear receptor subfamily 0, group B, member 1                   |
| 8431   | <i>NR0B2</i>  | nuclear receptor subfamily 0, group B, member 2                   |
| 8204   | <i>NRIP1</i>  | nuclear receptor interacting protein 1                            |
| 5111   | <i>PCNA</i>   | proliferating cell nuclear antigen                                |
| 64714  | <i>PDIA2</i>  | protein disulfide isomerase family A, member 2                    |
| 5241   | <i>PGR</i>    | progesterone receptor                                             |
| 11331  | <i>PHB2</i>   | prohibitin 2                                                      |
| 5457   | <i>POU4F1</i> | POU class 4 homeobox 1                                            |
| 5458   | <i>POU4F2</i> | POU class 4 homeobox 2                                            |
| 63977  | <i>PRDM15</i> | PR domain containing 15                                           |
| 5617   | <i>PRL</i>    | prolactin                                                         |
| 6294   | <i>SAFB</i>   | scaffold attachment factor B                                      |
| 6418   | <i>SET</i>    | SET nuclear oncogene                                              |
| 4089   | <i>SMAD4</i>  | SMAD family member 4                                              |
| 6647   | <i>SOD1</i>   | superoxide dismutase 1, soluble                                   |
| 10011  | <i>SRA1</i>   | steroid receptor RNA activator 1                                  |
| 6776   | <i>STAT5A</i> | signal transducer and activator of transcription 5A               |
| 7031   | <i>TFF1</i>   | trefoil factor 1                                                  |
| 286827 | <i>TRIM59</i> | tripartite motif containing 59                                    |
| 9039   | <i>UBA3</i>   | ubiquitin-like modifier activating enzyme 3.                      |
| 9040   | <i>UBE2M</i>  | ubiquitin-conjugating enzyme E2M                                  |
| 7494   | <i>XBP1</i>   | X-box binding protein 1                                           |

---

\*Based on Protein Interaction Database ER $\alpha$  nuclear receptor signaling gene set, with *ESR1* omitted, from: [http://software.broadinstitute.org/gsea/msigdb/cards/PID\\_ERA\\_GENOMIC\\_PATHWAY.html](http://software.broadinstitute.org/gsea/msigdb/cards/PID_ERA_GENOMIC_PATHWAY.html)  
See Schaefer CF, Anthony K, Krupa S, et al. PID: the Pathway Interaction Database. Nucleic Acids Res. Jan 2009;37(Database issue):D674-679. ER $\alpha$  = estrogen receptor alpha.

**Supplementary Table 2. Chemotherapy regimens for the OPSC-CR cohort**

| <b>Regimen</b>                                           | <b>No. of cases (%)</b> |
|----------------------------------------------------------|-------------------------|
| Cisplatin only                                           | 31 (14.4)               |
| Carboplatin only                                         | 5 (2.3)                 |
| Carboplatin + paclitaxel                                 | 83 (38.6)               |
| Cetuximab                                                | 32 (14.9)               |
| Carboplatin +/- paclitaxel, cetuximab or panitumumab     | 9 (4.2)                 |
| Paclitaxel alone                                         | 5 (2.3)                 |
| Carboplatin + paclitaxel + cetuximab                     | 4 (1.9)                 |
| Carboplatin + paclitaxel + panitumumab (Protocol 05-401) | 5 (2.3)                 |
| Carboplatin + other (data unavailable)                   | 6 (2.8)                 |
| Cisplatin + fluorouracil                                 | 1 (0.5)                 |
| Cisplatin + paclitaxel                                   | 1 (0.5)                 |
| Unspecified carboplatin or cisplatin                     | 1 (0.5)                 |
| Unspecified                                              | 32(14.9)                |
| <b>Total</b>                                             | <b>215 (100.0)</b>      |

**Supplementary Table 3. Five-year survival versus ER $\alpha$  status, OPSC-CR cohort**

| Survival type             | Five-year survival, % (95% CI) |                       | P-value* |
|---------------------------|--------------------------------|-----------------------|----------|
|                           | ER $\alpha$ -positive          | ER $\alpha$ -negative |          |
| Overall survival          | 90.0 (84.1-95.9)               | 64.0 (54.2-73.8)      | < 0.001  |
| Disease-specific survival | 91.0 (85.1-96.9)               | 66.5 (56.7-76.3)      | < 0.001  |
| Progression-free survival | 86.2 (80.3-92.1)               | 69.5 (59.7-79.3)      | 0.004    |
| Relapse-free survival     | 90.4 (84.5-96.3)               | 76.7 (66.9-86.5)      | 0.01     |

\* P values were calculated using a two-sided z-test. ER = estrogen receptor; CI = confidence interval.

**Supplementary Table 4. Clinical characteristics of the HPV-positive subset of the OPSC-CR cohort and their relations to ER $\alpha$  status**

| Clinical characteristic    | No. (%)          |                         |                          | P-value         |
|----------------------------|------------------|-------------------------|--------------------------|-----------------|
|                            | Total<br>(n=177) | ER $\alpha$ -<br>(n=74) | ER $\alpha$ +<br>(n=103) |                 |
| Sex                        |                  |                         |                          |                 |
| Male                       | 145 (81.9)       | 64 (86.5)               | 81 (78.6)                | 0.24*           |
| Female                     | 32 (18.1)        | 10 (13.5)               | 22 (21.4)                |                 |
| Age, y                     |                  |                         |                          |                 |
| $\leq$ 60                  | 123 (69.5)       | 52 (70.2)               | 71 (68.9)                | 0.87*           |
| $>$ 60                     | 54 (30.5)        | 22 (29.8)               | 32 (31.1)                |                 |
| Race                       |                  |                         |                          |                 |
| Caucasian                  | 161 (91.0)       | 64 (94.1)               | 97 (97.0)                | 0.44*           |
| Non-Caucasian              | 7 (3.9)          | 4 (5.9)                 | 3 (3.0)                  |                 |
| Unknown                    | 9 (5.1)          | —                       | —                        |                 |
| Site                       |                  |                         |                          |                 |
| Tonsil                     | 83 (46.9)        | 33 (44.6)               | 50 (48.5)                | 0.11 $\ddagger$ |
| BOT                        | 88 (49.7)        | 36 (48.6)               | 52 (50.5)                |                 |
| Other                      | 6 (3.4)          | 5 (6.8)                 | 1 (1.0)                  |                 |
| Alcohol Use                |                  |                         |                          |                 |
| No Abuse                   | 143 (80.8)       | 61 (85.9)               | 82 (88.2)                | 0.81*           |
| Abuse                      | 21 (11.9)        | 10 (14.1)               | 11 (11.8)                |                 |
| Unknown                    | 13 (7.3)         | —                       | —                        |                 |
| Smoking Status             |                  |                         |                          |                 |
| Never                      | 70 (39.5)        | 27 (36.5)               | 43 (41.2)                | 0.53*           |
| Ever                       | 106 (59.9)       | 47 (63.5)               | 59 (57.8)                |                 |
| Unknown                    | 1 (0.6)          | —                       | —                        |                 |
| Tumor Classification       |                  |                         |                          |                 |
| T0-2                       | 130 (73.5)       | 52 (73.2)               | 78 (77.2)                | 0.59*           |
| T3-4                       | 42 (23.7)        | 19 (26.7)               | 23 (22.8)                |                 |
| Unknown                    | 5 (2.8)          | —                       | —                        |                 |
| Nodal Classification       |                  |                         |                          |                 |
| N0-N2a                     | 70 (39.5)        | 34 (46.6)               | 36 (35.6)                | 0.16*           |
| N2b-N3                     | 104 (58.8)       | 39 (53.4)               | 65 (64.4)                |                 |
| Unknown                    | 3 (1.7)          | —                       | —                        |                 |
| Metastasis at presentation |                  |                         |                          |                 |
| M0                         | 167 (94.4)       | 70 (95.9)               | 97 (98.0)                | 0.50*           |
| M1                         | 5 (2.8)          | 3 (4.1)                 | 2 (2.0)                  |                 |
| Unknown                    | 5 (2.8)          | —                       | —                        |                 |
| Tumor Keratinization       |                  |                         |                          |                 |
| No                         | 146 (82.5)       | 57 (77.0)               | 89 (86.4)                | 0.11*           |
| Yes                        | 31 (17.5)        | 17 (23.0)               | 14 (13.6)                |                 |

\* P values were calculated using a two-sided Fisher exact test. BOT = base of tongue; HPV = human papillomavirus.

$\ddagger$  P value was calculated using a two-sided Pearson Chi-square test.

Supplementary Table 5. Concordance and validation of 6-predictor models in the OPSC-CR Cohort.

| Model | Bootstrap validation/calibration* |                      |                |       | Proportional hazard (PH) tests† |                    |                |                   |                |                    |
|-------|-----------------------------------|----------------------|----------------|-------|---------------------------------|--------------------|----------------|-------------------|----------------|--------------------|
|       | Concordance                       | Adjusted Concordance | Slope optimism | MAE   | Coefficients                    | Model in main text |                | Stratified model‡ |                |                    |
|       |                                   |                      |                |       |                                 | Global PH          | Coefficient PH | Global PH         | Coefficient PH | HR (95% CI)        |
| OS    | 0.77                              | 0.75                 | 0.127          | 0.016 | ER $\alpha$                     | 0.87               | 0.89           | --                | --             | --                 |
|       |                                   |                      |                | 0.017 | HPV                             |                    | 0.82           |                   |                |                    |
|       |                                   |                      |                | 0.042 | T > 2                           |                    | 0.39           |                   |                |                    |
|       |                                   |                      |                |       | Ever Smoker                     |                    | 0.41           |                   |                |                    |
|       |                                   |                      |                |       | Age > 60 y                      |                    | 0.58           |                   |                |                    |
|       |                                   |                      |                |       | Sex                             |                    | 0.72           |                   |                |                    |
| DSS   | 0.79                              | 0.75                 | 0.146          | 0.010 | ER $\alpha$                     | 0.53               | 0.81           | 0.98              | 0.79           | 0.30 (0.14 - 0.67) |
|       |                                   |                      |                | 0.014 | HPV                             |                    | 0.46           |                   | 0.48           | 0.72 (0.33 - 1.57) |
|       |                                   |                      |                | 0.015 | T > 2                           |                    | 0.89           |                   | 0.85           | 3.32 (1.65 - 6.65) |
|       |                                   |                      |                |       | Ever Smoker                     |                    | 1.00           |                   | 0.99           | 2.04 (0.87 - 4.77) |
|       |                                   |                      |                |       | Age > 60 y                      |                    | 0.05           |                   | Stratified     | --                 |
|       |                                   |                      |                |       | Sex                             |                    | 0.68           |                   | 0.63           | 0.78 (0.27 - 2.28) |
| PFS   | 0.75                              | 0.72                 | 0.149          | 0.030 | ER $\alpha$                     | 0.08               | 0.98           | 1.00              | 0.97           | 0.50 (0.25 - 0.99) |
|       |                                   |                      |                | 0.032 | HPV                             |                    | 0.90           |                   | 0.87           | 0.78 (0.35 - 1.72) |
|       |                                   |                      |                | 0.020 | T > 2                           |                    | 0.05           |                   | Stratified     | --                 |
|       |                                   |                      |                |       | Ever Smoker                     |                    | 0.86           |                   | 0.84           | 1.92 (0.86 - 4.28) |
|       |                                   |                      |                |       | Age > 60 y                      |                    | 0.01           |                   | Stratified     | --                 |
|       |                                   |                      |                |       | Sex                             |                    | 0.67           |                   | 0.82           | 0.36 (0.11 - 1.20) |
| RFS   | 0.74                              | 0.69                 | 0.279          | 0.018 | ER $\alpha$                     | 0.62               | 0.20           | --                | --             | --                 |
|       |                                   |                      |                | 0.009 | HPV                             |                    | 0.95           |                   |                |                    |
|       |                                   |                      |                | 0.041 | T > 2                           |                    | 0.47           |                   |                |                    |
|       |                                   |                      |                |       | Ever Smoker                     |                    | 0.80           |                   |                |                    |
|       |                                   |                      |                |       | Age > 60 y                      |                    | 0.55           |                   |                |                    |
|       |                                   |                      |                |       | Sex                             |                    | 0.28           |                   |                |                    |

\* Via *validate* and *calibrate* functions in R *rms* package, with default settings. MAE: mean absolute error in optimism-corrected predicted fraction surviving for 18, 36, and 84 months (from top to bottom in each cell). HPV = human papilloma virus; CI = confidence interval; HR = hazard ratio; OS = overall survival; DSS = disease-specific survival; PFS = progression-free survival; RFS = relapse-free survival.

† Test of trend in scaled Schoenfeld residuals with time; via *cox.zph* function in R *survival* package, with default settings.

‡ Stratified by coefficients found to have  $P < 0.2$  in PH tests of full model. Hazard ratios for remaining variables are similar to those in the models presented in the main text (Figures 5 and 6).

## Supplementary Figures

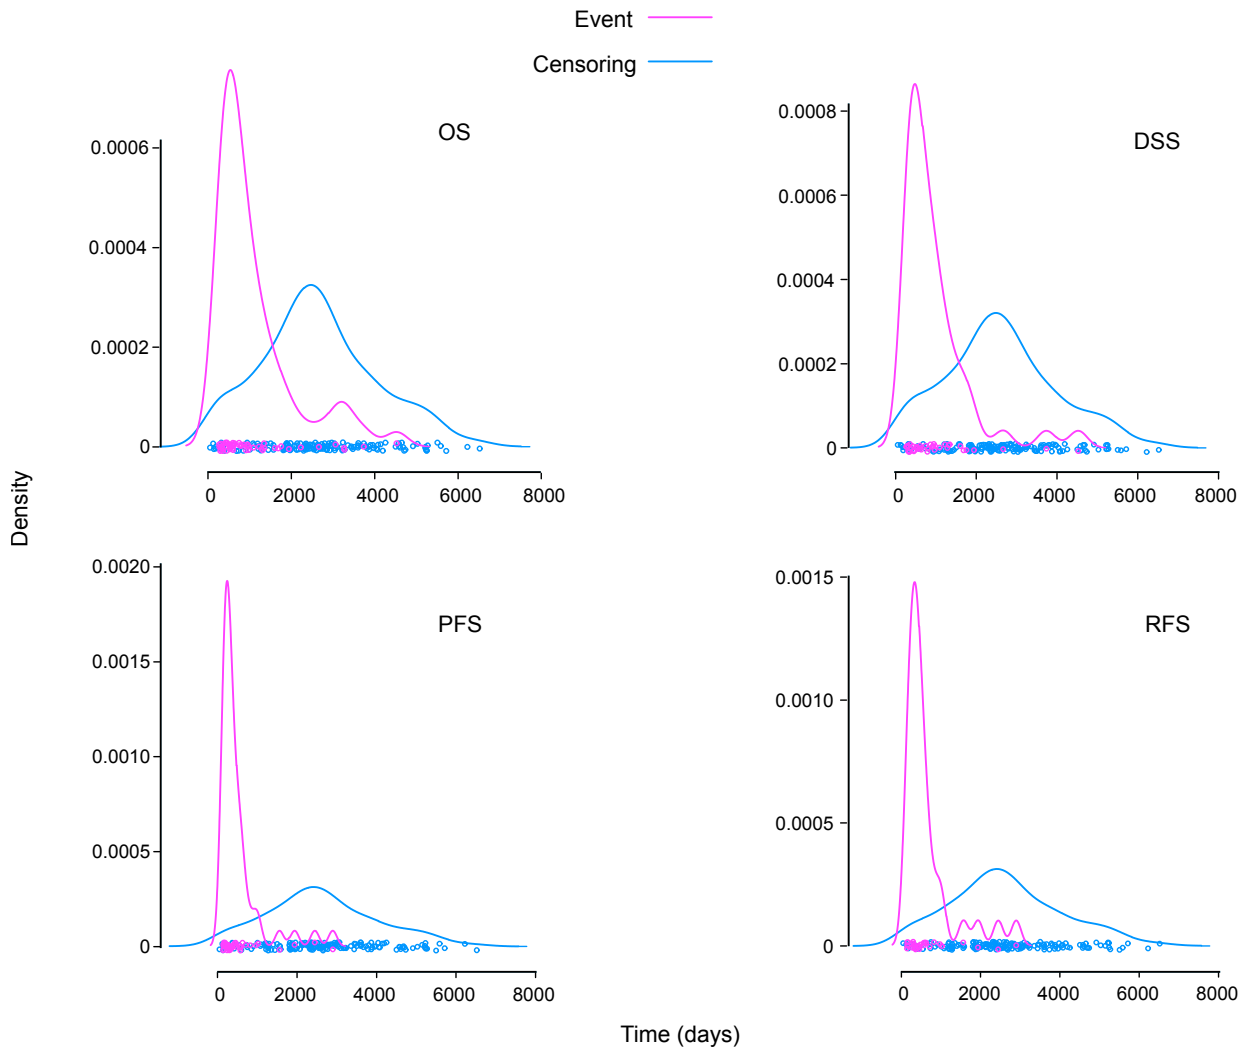

**Supplementary Figure 1. Distributions of event and censoring times for the OSPC-CR cohort.** Density plots of event times (magenta) and censoring times (cyan) for overall survival (OS), disease-specific survival (DSS), progression-free survival (PFS), and relapse-free survival (RFS), as defined in the text. For all measures of survival, censoring times are typically much greater than event times, indicating that further follow up would not have substantially affected survival analysis. Median time to event in years (1st and 3rd quartiles): OS 2.06(1.27-3.66); DSS, 1.74(1.21-3.18); PFS, 0.89(0.64-1.57); RFS, 1.20(0.85-1.86) Median time to censoring (1st and 3rd quartiles): OS, 6.98 (5.00-9.54); DSS, 6.93(4.97-9.42); PFS, 6.90 (4.98-9.73); RFS,6.90(4.98-9.73).

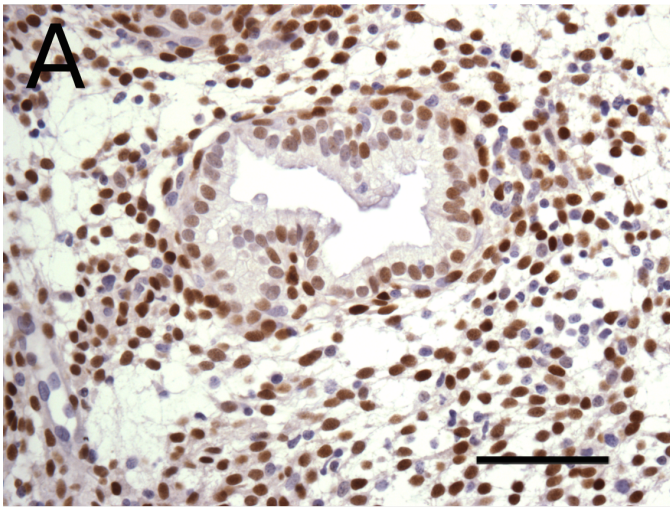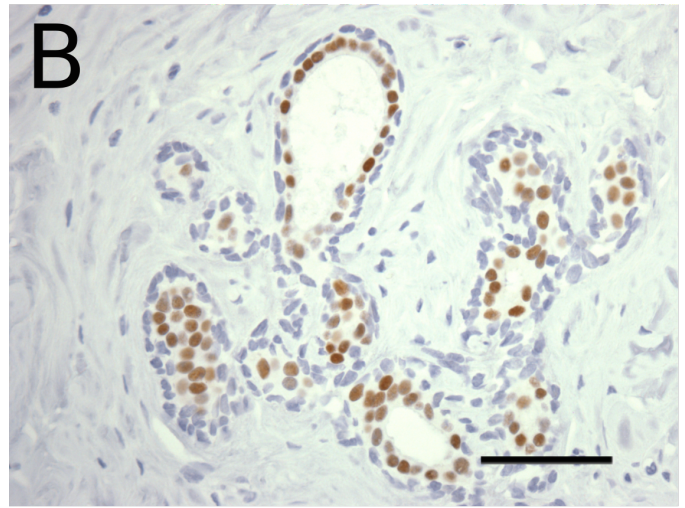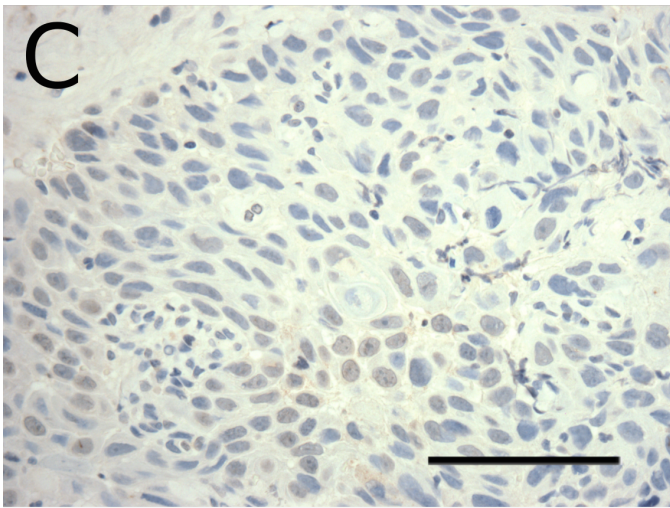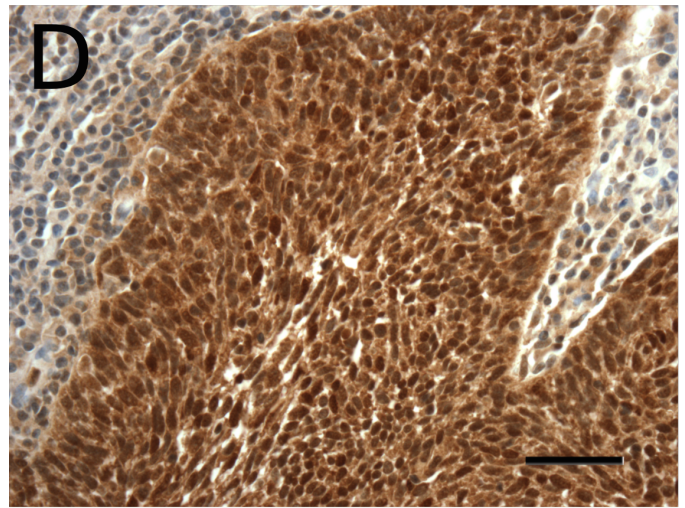

**Supplementary Figure 2. ER $\alpha$  immunohistochemical controls and OPSC p16 staining.** A) Normal endometrium positive for ER $\alpha$ . B) Breast cancer positive control for ER $\alpha$ . C) OPSC negative for p16. D) OPSC positive for p16. Scale bars represent 200 micrometers. ER $\alpha$ =estrogen receptor alpha; OPSC = oropharyngeal squamous carcinoma.
